# Supplementary material
Source: ML conference proceedings conference paper supplement (https://openreview.net/forum?id=eFP90pzlIz)
Supplement: supplementary_material [file attachment]

|                                                                                             |                                                                                     |                                                                                               |                                                                                     |                                                                                               |
|---------------------------------------------------------------------------------------------|-------------------------------------------------------------------------------------|-----------------------------------------------------------------------------------------------|-------------------------------------------------------------------------------------|-----------------------------------------------------------------------------------------------|
| nine<br>     |     | Row:1<br>     |     | three<br>    |
| five<br>    |    | Row:2<br>    |    | three<br>   |
| one<br>     |    | Row:3<br>    |    | two<br>     |
| one<br>     |    | Row:4<br>    |    | two<br>     |
| seven<br>   |    | Row:5<br>    |    | two<br>     |
| three<br>  |   | Row:6<br>   |   | five<br>   |
| seven<br> |  | Row:7<br>  |  | two<br>   |
| six<br>   |  | Row:8<br>  |  | two<br>   |
| four<br>  |  | Row:9<br>  |  | six<br>   |
| four<br>  |  | Row:10<br> |  | three<br> |
| two<br>   |  | Row:11<br> |  | nine<br>  |
| three<br> |  | Row:12<br> |  | two<br>   |
| six<br>   |  | Row:13<br> |  | two<br>   |
| two<br>   |  | Row:14<br> |  | one<br>   |
| five<br>  |  | Row:15<br> |  | three<br> |
| nine<br>  |  | Row:16<br> |  | three<br> |
| eight<br> |  | Row:17<br> |  | three<br> |
| ten<br>   |  | Row:18<br> |  | three<br> |
| ten<br>   |  | Row:19<br> |  | four<br>  |
| eight<br> |  | Row:20<br> |  | two<br>   |
| (a) Clean                                                                                   | (b) PGD-LPIPS                                                                       | (c) Square                                                                                    | (d) GPGD@12                                                                         | (e) GPGD@24                                                                                   |
