# Supplementary material
Source: ML conference proceedings conference paper supplement (https://openreview.net/forum?id=eFP90pzlIz)

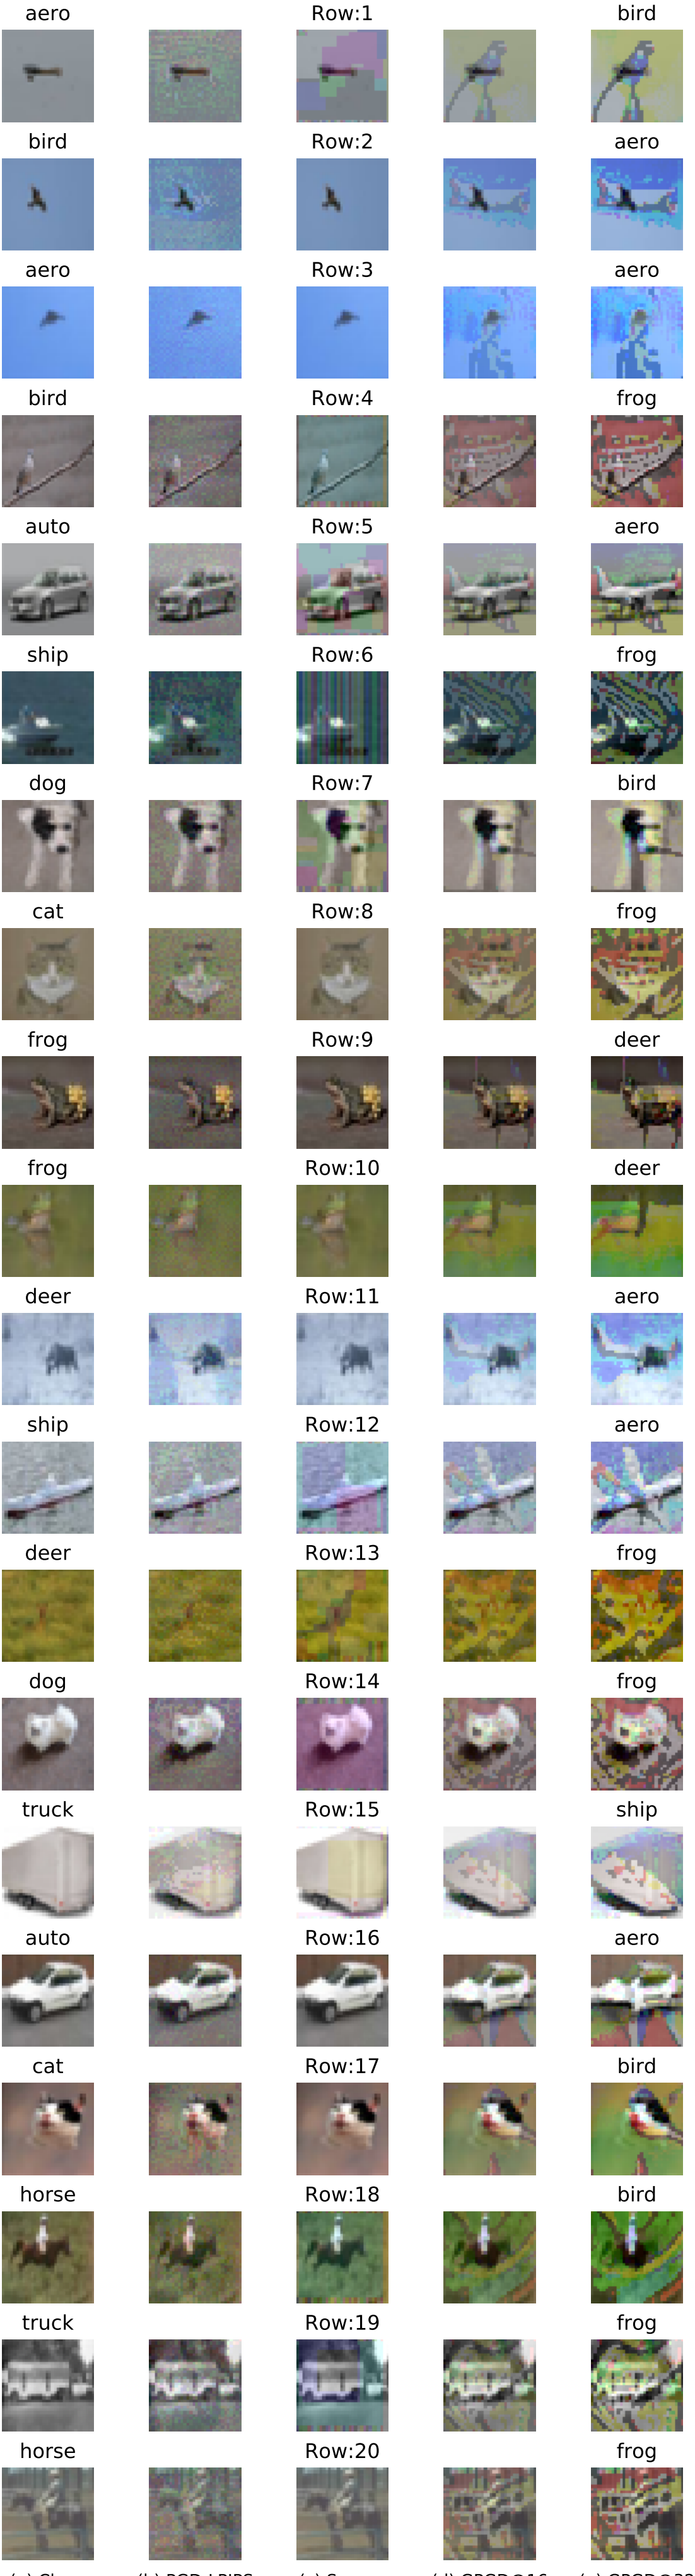

Supplement: supplementary_material [file attachment]

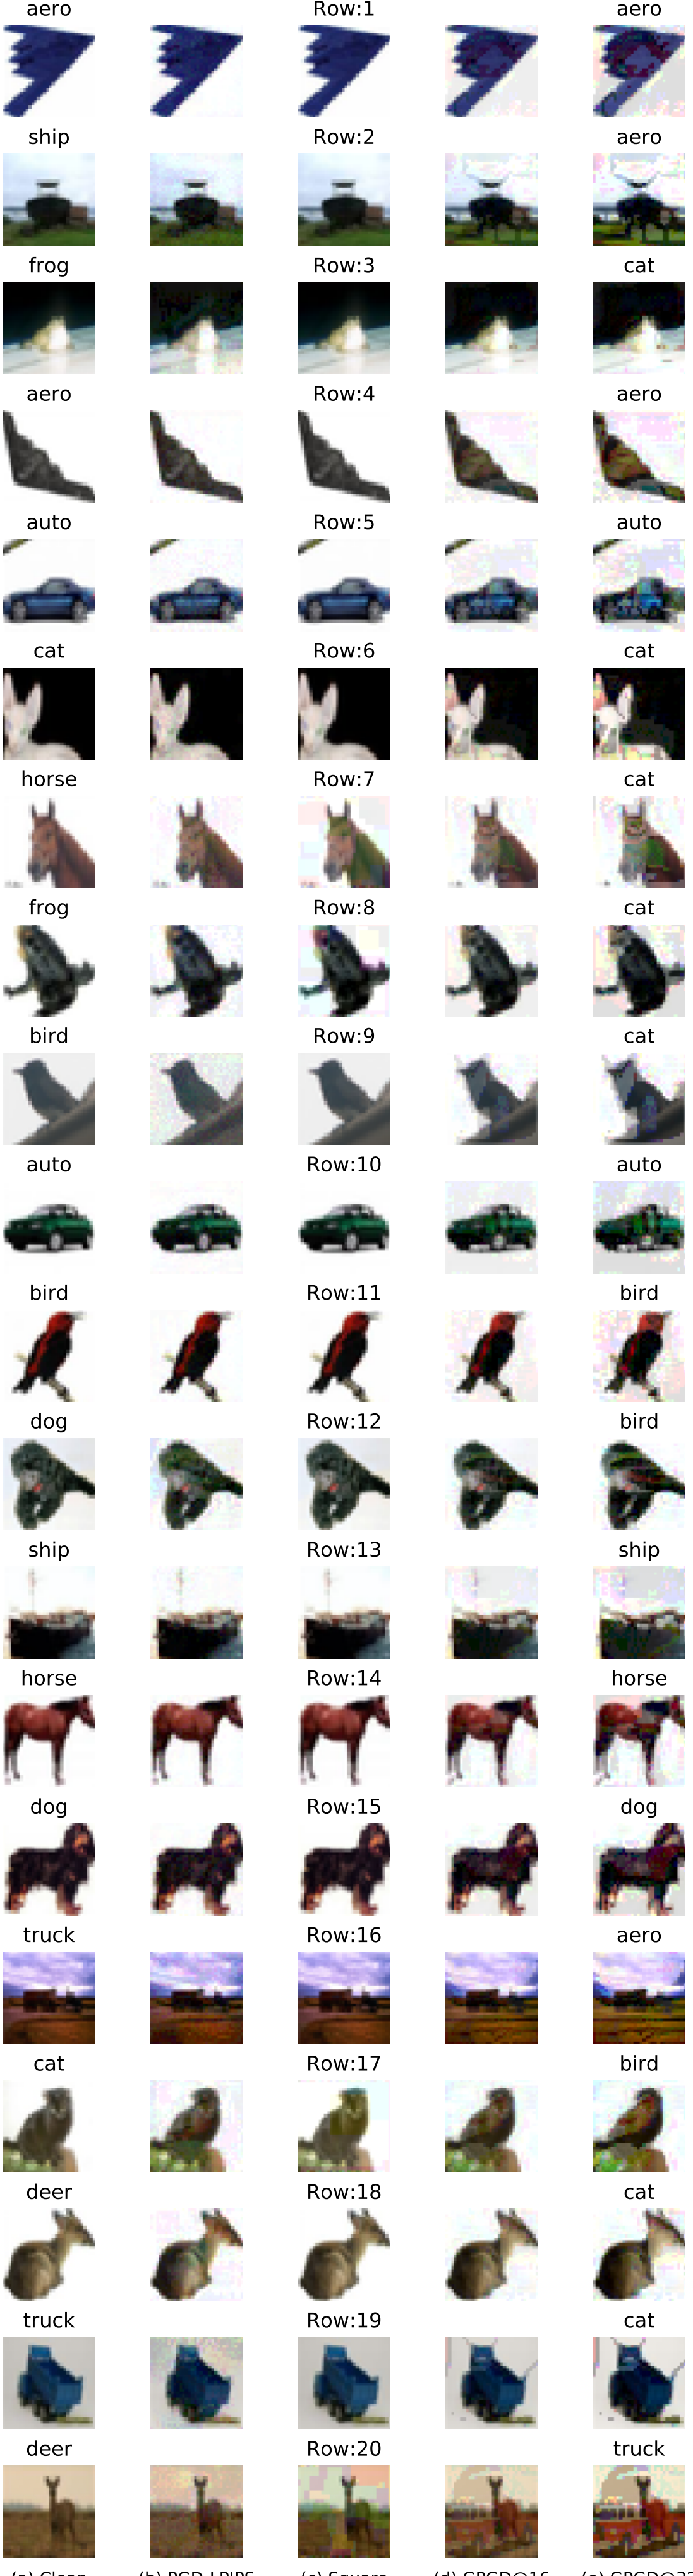

Supplement: supplementary_material [file attachment]

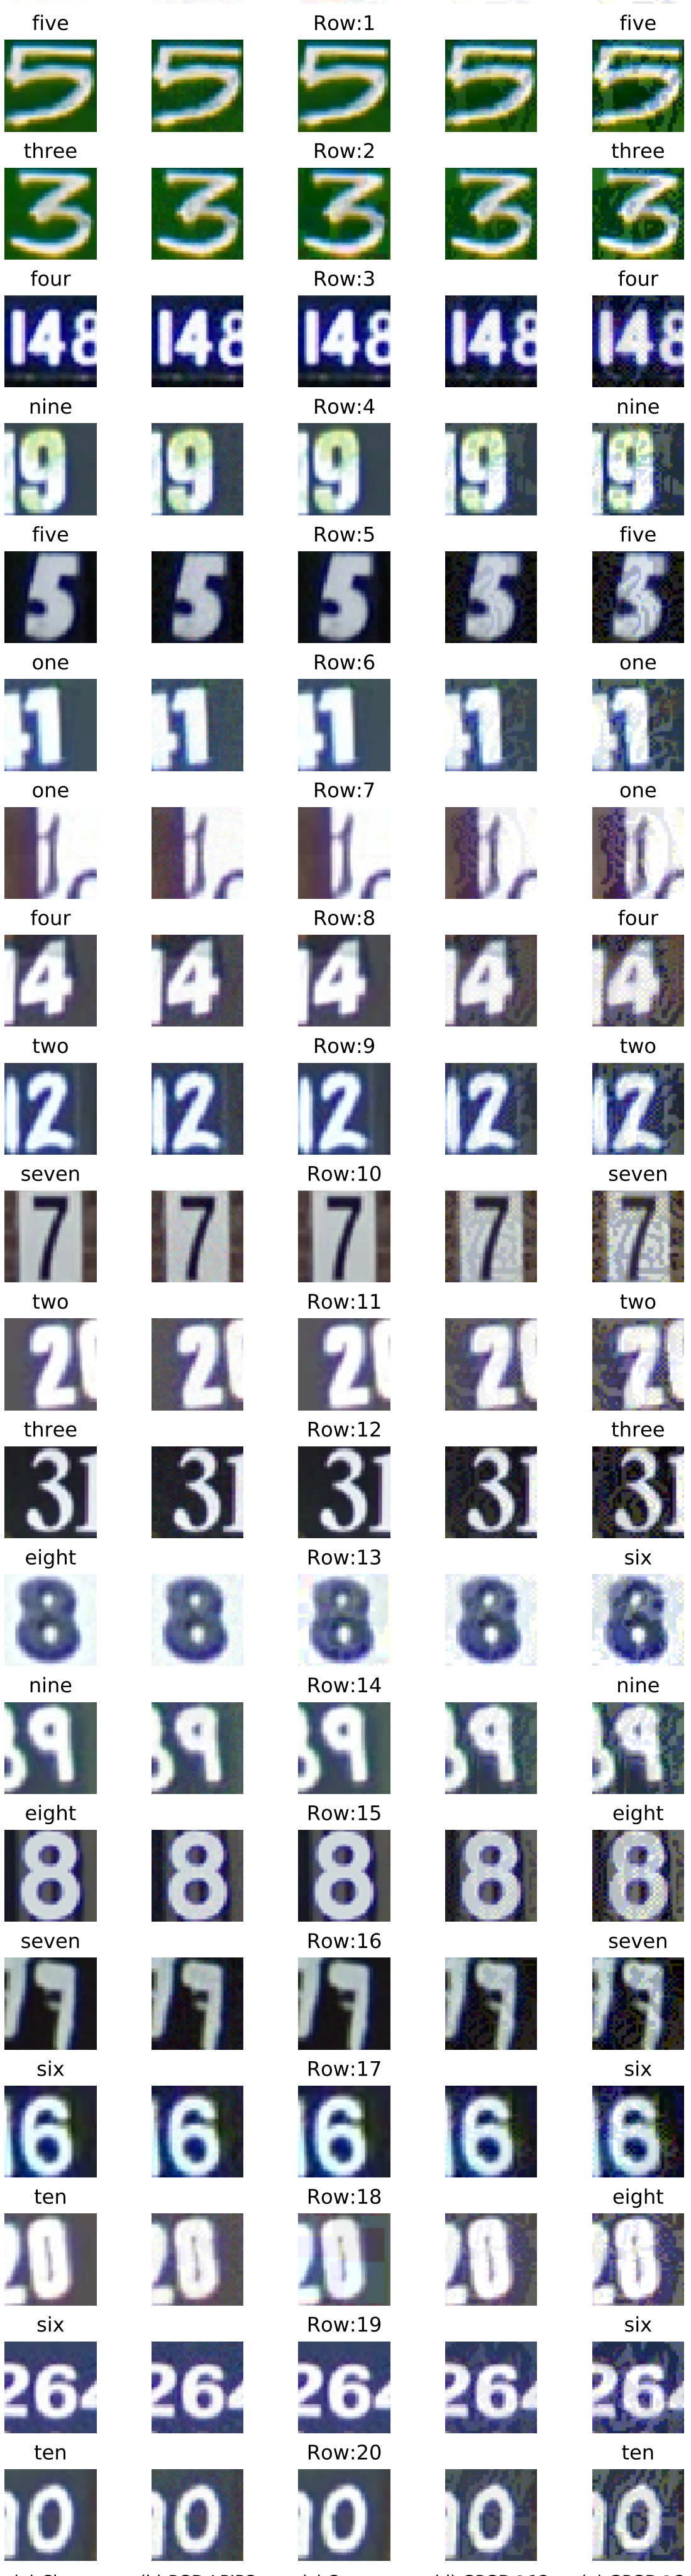

(a) Clean

(b) PGD-LPIPS

(c) Square

(d) GPGD@12

(e) GPGD@24

Supplement: supplementary_material [file attachment]

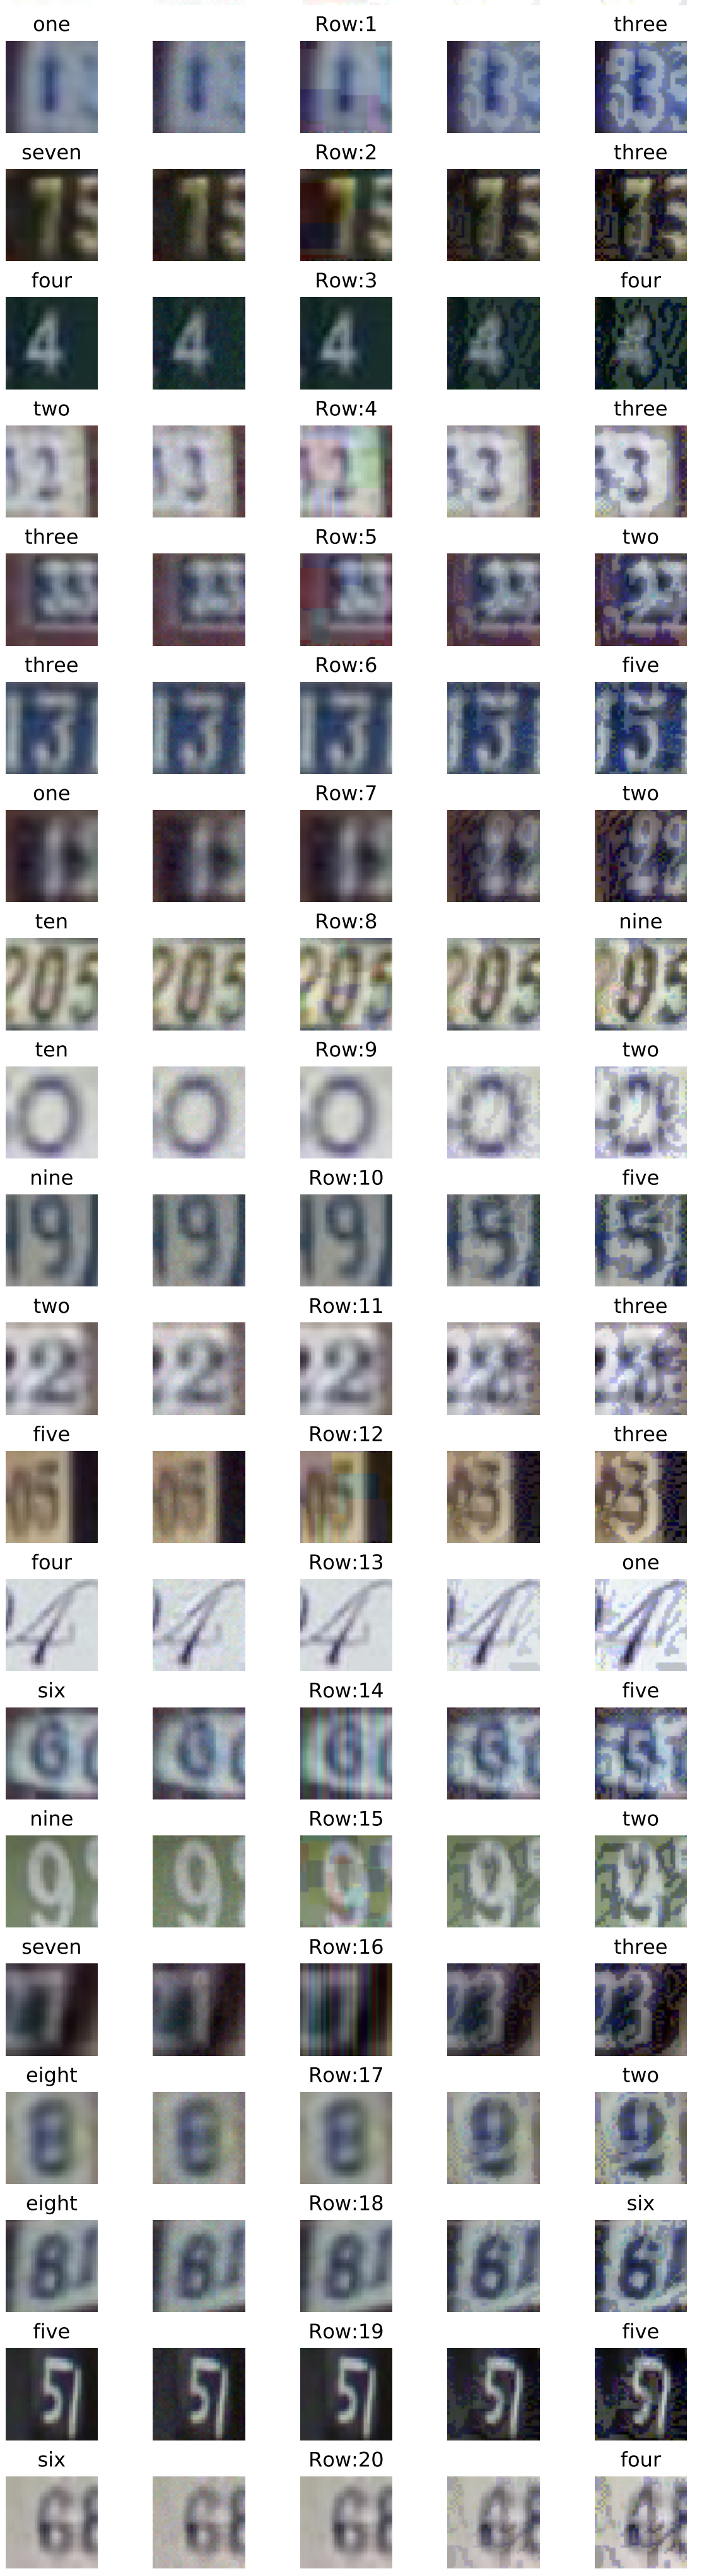

Supplement: supplementary_material [file attachment]

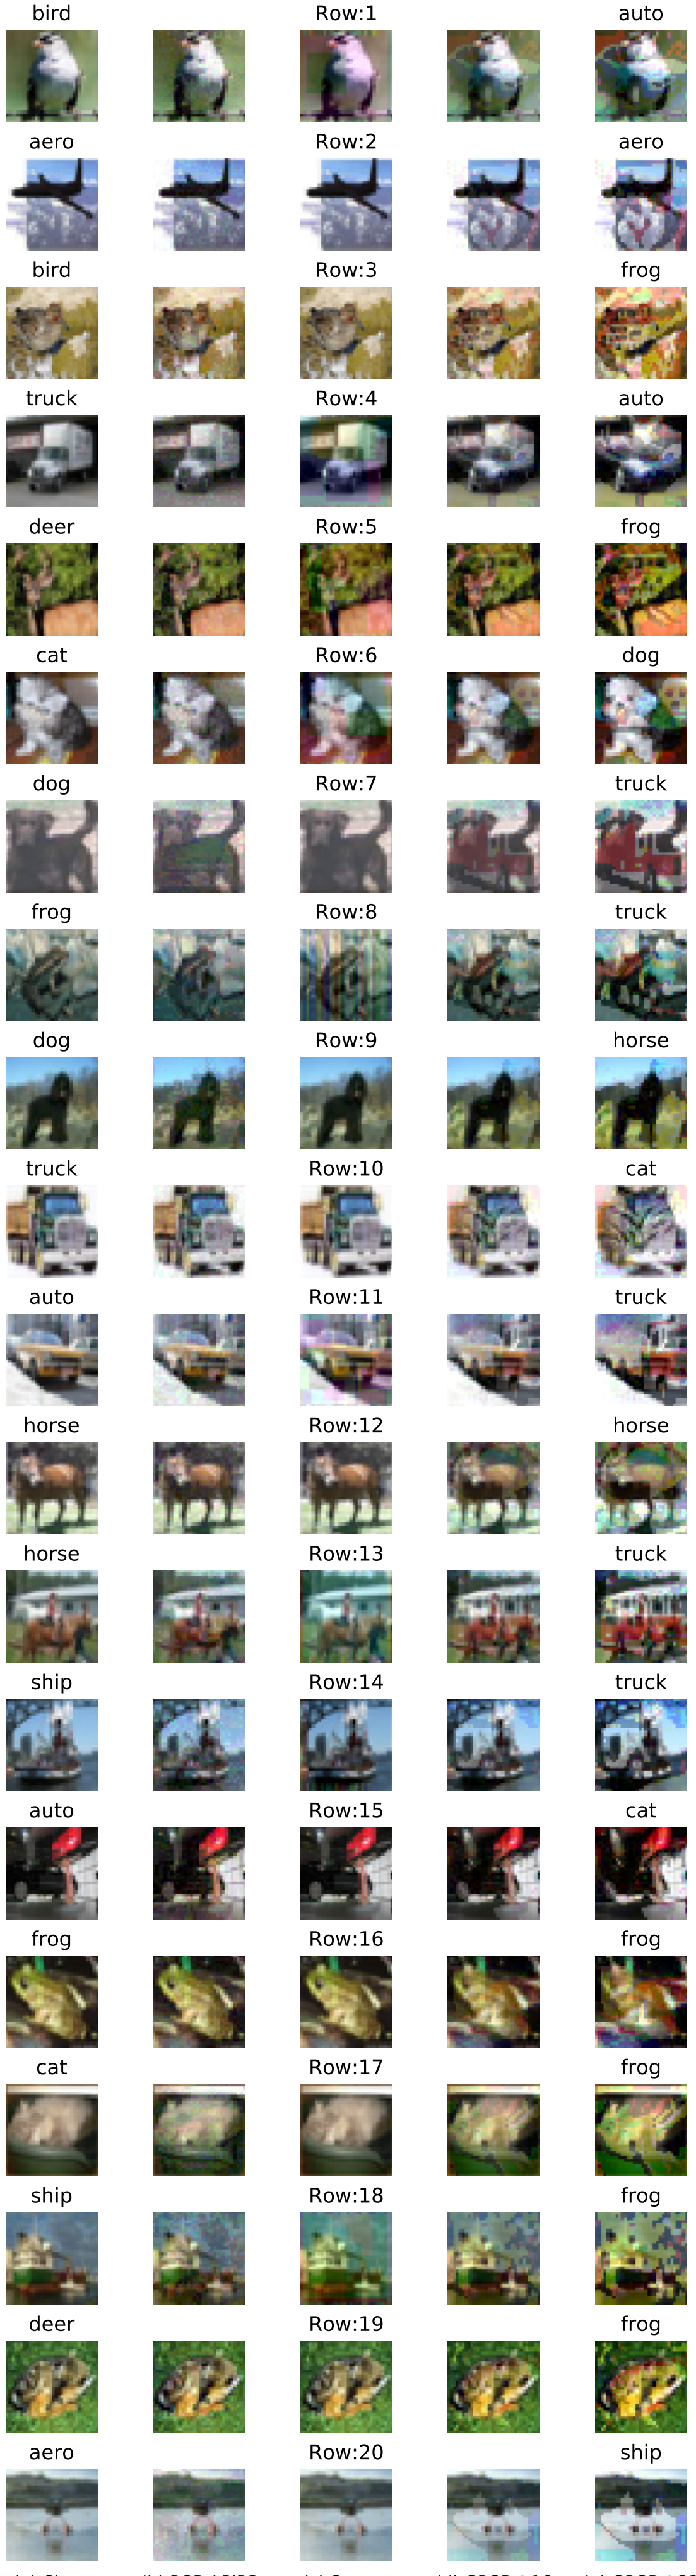

Supplement: supplementary_material [file attachment]
